# Supplementary material for: A Grain-Based SARA Challenge Affects the Composition of Epimural and Mucosa-Associated Bacterial Communities throughout the Digestive Tract of Dairy Cows
Source: MDPI journal article supplement (doi:10.3390/ani11061658), 2021-06-02
Supplement: s1 [file s1]

**Table S1.** Effects of the SARA challenge on the relative abundances of phyla with an abundance above 0.1% by region of the digestive tract.

| <b>Rumen</b>            |                |             |            |                                 |
|-------------------------|----------------|-------------|------------|---------------------------------|
|                         | <b>Control</b> | <b>SARA</b> | <b>SEM</b> | <b>Effects, <i>P</i> values</b> |
| Firmicutes              | 43.0b          | 64.8a       | 10.2       | 0.05                            |
| Bacteroidetes           | 33.7a          | 16.2b       | 5.69       | 0.05                            |
| Proteobacteria          | 9.0x           | 4.2y        | 2.32       | 0.08                            |
| Spirochaetes            | 4.5            | 4.2         | 3.02       | 0.21                            |
| Fibrobacteres           | 2.7            | 3.4         | 2.46       | 0.29                            |
| Tenericutes             | 2.4a           | 0.5b        | 0.77       | 0.005                           |
| Euryarchaeota           | 0.79a          | 0.24b       | 0.096      | 0.01                            |
| Verrucomicrobia         | 0.36a          | 0.08b       | 0.037      | 0.002                           |
| Actinobacteria          | 0.31b          | 5.54a       | 1.34       | 0.005                           |
| Chloroflexi             | 0.30x          | 0.13y       | 0.056      | 0.08                            |
| Cyanobacteria           | 0.029          | 0.13        | 0.041      | 0.13                            |
| <b>Duodenum</b>         |                |             |            |                                 |
|                         | <b>Control</b> | <b>SARA</b> | <b>SEM</b> | <b>Effects, <i>P</i> values</b> |
| Firmicutes              | 60.00          | 59.00       | 7.08       | 0.88                            |
| Bacteroidetes           | 18.90          | 11.50       | 4.76       | 0.32                            |
| Proteobacteria          | 9.34           | 14.90       | 5.93       | 0.88                            |
| Actinobacteria          | 4.90y          | 11.90x      | 2.34       | 0.06                            |
| Euryarchaeota           | 1.60a          | 0.32b       | 0.39       | 0.04                            |
| Tenericutes             | 1.57           | 0.90        | 0.43       | 0.27                            |
| Spirochaetes            | 1.41           | 0.53        | 0.71       | 0.22                            |
| Cyanobacteria           | 0.52a          | 0.07b       | 0.13       | 0.02                            |
| Verrucomicrobia         | 0.43a          | 0.05b       | 0.11       | 0.02                            |
| Fibrobacteres           | 0.33a          | 0.12b       | 0.06       | 0.03                            |
| Chloroflexi             | 0.07           | 0.07        | 0.05       | 0.96                            |
| <b>Proximal jejunum</b> |                |             |            |                                 |
|                         | <b>Control</b> | <b>SARA</b> | <b>SEM</b> | <b>Effects, <i>P</i> values</b> |
| Firmicutes              | 66.1           | 54.7        | 8.43       | 0.42                            |
| Bacteroidetes           | 10.6x          | 6.7y        | 1.23       | 0.07                            |
| Proteobacteria          | 10.4           | 11.2        | 2.18       | 0.85                            |
| Actinobacteria          | 6.2y           | 25.1x       | 7.78       | 0.07                            |
| Euryarchaeota           | 2.0a           | 0.4b        | 0.65       | 0.10                            |
| Tenericutes             | 2.0a           | 0.6b        | 0.37       | 0.03                            |
| Spirochaetes            | 0.92a          | 0.14b       | 0.143      | 0.005                           |
| Cyanobacteria           | 0.48x          | 0.14y       | 0.114      | 0.08                            |
| Verrucomicrobia         | 0.34x          | 0.14y       | 0.067      | 0.08                            |
| Fibrobacteres           | 0.26           | 0.11        | 0.088      | 0.37                            |
| Chloroflexi             | 0.033          | 0.12        | 0.0522     | 0.31                            |
| <b>Middle jejunum</b>   |                |             |            |                                 |
|                         | <b>Control</b> | <b>SARA</b> | <b>SEM</b> | <b>Effects, <i>P</i> values</b> |
| Firmicutes              | 59.0           | 62.8        | 5.83       | 0.63                            |
| Proteobacteria          | 20.0           | 13.8        | 3.89       | 0.29                            |
| Bacteroidetes           | 9.8            | 7.3         | 1.69       | 0.33                            |
| Actinobacteria          | 4.7b           | 13.4a       | 2.91       | 0.05                            |
| Tenericutes             | 2.0            | 1.3         | 0.44       | 0.36                            |
| Euryarchaeota           | 1.40x          | 0.41y       | 0.37       | 0.08                            |
| Cyanobacteria           | 0.69x          | 0.10y       | 0.22       | 0.08                            |
| Spirochaetes            | 0.62           | 0.2         | 0.17       | 0.13                            |
| Verrucomicrobia         | 0.35           | 0.13        | 0.212      | 0.75                            |
| Fibrobacteres           | 0.18           | 0.062       | 0.078      | 0.34                            |
| Chloroflexi             | 0.17x          | 0.033y      | 0.044      | 0.05                            |
| <b>Distal jejunum</b>   |                |             |            |                                 |

|                 | Control | SARA   | SEM    | Effects, <i>P</i> values |
|-----------------|---------|--------|--------|--------------------------|
| Firmicutes      | 79.8a   | 53.3b  | 6.62   | 0.03                     |
| Proteobacteria  | 6.5     | 21.5   | 5.01   | 0.13                     |
| Bacteroidetes   | 4.9     | 3.6    | 1.41   | 0.65                     |
| Actinobacteria  | 3.8b    | 21a    | 4.78   | 0.05                     |
| Euryarchaeota   | 1.7     | 0.12   | 0.36   | 0.005                    |
| Tenericutes     | 1.6     | 0.27   | 0.378  | 0.036                    |
| Spirochaetes    | 0.47    | 0.023  | 0.183  | 0.14                     |
| Cyanobacteria   | 0.32a   | 0.02b  | 0.074  | 0.02                     |
| Verrucomicrobia | 0.21    | 0.11   | 0.077  | 0.26                     |
| Fibrobacteres   | 0.18    | 0.041  | 0.08   | 0.2                      |
| Chloroflexi     | 0.13a   | 0.025b | 0.02   | 0.01                     |
| <b>Ileum</b>    |         |        |        |                          |
|                 | Control | SARA   | SEM    | Effects, <i>P</i> values |
| Firmicutes      | 78.0a   | 52.2b  | 7.97   | 0.05                     |
| Proteobacteria  | 7.8     | 20.2   | 7.79   | 0.95                     |
| Bacteroidetes   | 5.4     | 10.4   | 2.16   | 0.12                     |
| Actinobacteria  | 3.4b    | 15.8a  | 3.92   | 0.04                     |
| Euryarchaeota   | 2.0a    | 0.13b  | 0.306  | 0.01                     |
| Tenericutes     | 1.9x    | 0.6y   | 0.433  | 0.09                     |
| Cyanobacteria   | 0.51x   | 0.09y  | 0.17   | 0.09                     |
| Spirochaetes    | 0.28    | 0.15   | 0.088  | 0.39                     |
| Verrucomicrobia | 0.23x   | 0.094y | 0.053  | 0.10                     |
| Chloroflexi     | 0.13    | 0.026  | 0.05   | 0.18                     |
| Fibrobacteres   | 0.11    | 0.033  | 0.063  | 0.42                     |
| <b>Cecum</b>    |         |        |        |                          |
|                 | Control | SARA   | SEM    | Effects, <i>P</i> values |
| Firmicutes      | 54.2    | 63.0   | 6.47   | 0.19                     |
| Bacteroidetes   | 27.2    | 18.8   | 5.15   | 0.12                     |
| Spirochaetes    | 13.6    | 14.2   | 5.93   | 0.82                     |
| Verrucomicrobia | 0.95    | 0.16   | 0.40   | 0.13                     |
| Proteobacteria  | 0.86a   | 0.53b  | 0.079  | 0.02                     |
| Tenericutes     | 0.79    | 0.70   | 0.125  | 0.62                     |
| Euryarchaeota   | 0.37a   | 0.03b  | 0.047  | 0.01                     |
| Actinobacteria  | 0.20    | 1.70   | 0.54   | 0.05                     |
| Fibrobacteres   | 0.16a   | 0.004b | 0.035  | 0.01                     |
| Cyanobacteria   | 0.15a   | 0.012b | 0.044  | 0.03                     |
| Chloroflexi     | 0.011   | 0.004  | 0.0033 | 0.18                     |
| <b>Colon</b>    |         |        |        |                          |
|                 | Control | SARA   | SEM    | Effects, <i>P</i> values |
| Firmicutes      | 47.8b   | 70.3a  | 5.38   | 0.02                     |
| Bacteroidetes   | 32.2a   | 19.4b  | 5.24   | 0.05                     |
| Spirochaetes    | 14.2a   | 0.88b  | 2.28   | 0.001                    |
| Proteobacteria  | 1.3     | 0.88   | 0.177  | 0.10                     |
| Tenericutes     | 0.83a   | 0.27b  | 0.157  | 0.04                     |
| Verrucomicrobia | 0.66    | 0.37   | 0.29   | 0.23                     |
| Euryarchaeota   | 0.55a   | 0.06b  | 0.061  | 0.002                    |
| Cyanobacteria   | 0.35a   | 0.02b  | 0.074  | 0.006                    |
| Fibrobacteres   | 0.31a   | 0.00b  | 0.0356 | 0.0002                   |
| Actinobacteria  | 0.12b   | 7.50a  | 1.66   | 0.002                    |
| Chloroflexi     | 0.0068  | 0.0184 | 0.0077 | 0.34                     |

<sup>a, b</sup> Lsmeans with different superscripts in a row differ ( $P < 0.05$ ), <sup>x, y</sup> Lsmeans with different superscripts in a row tend to differ ( $P < 0.10$ ).

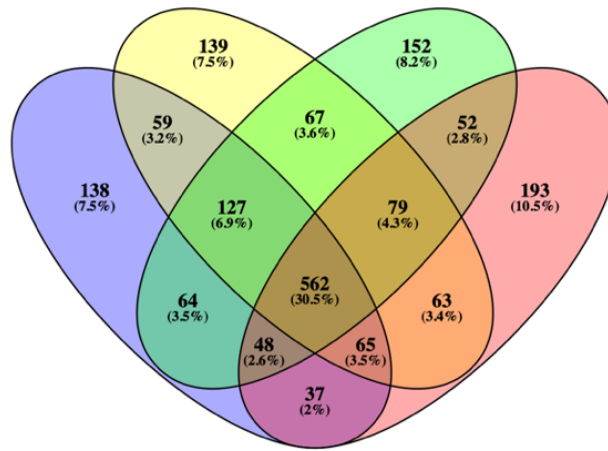

**Supplementary figure 1A.** Venn diagram of shared OTU in epimural microbiota in the rumen of control cows.

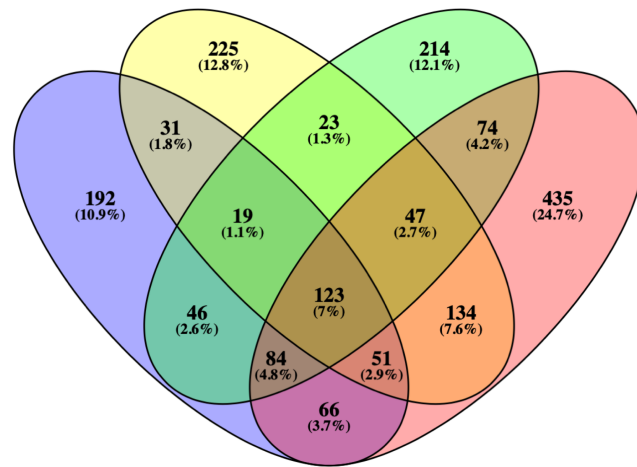

**Supplementary figure 1B.** Venn diagram of shared OTU in epimural microbiota in the duodenum of control cows.

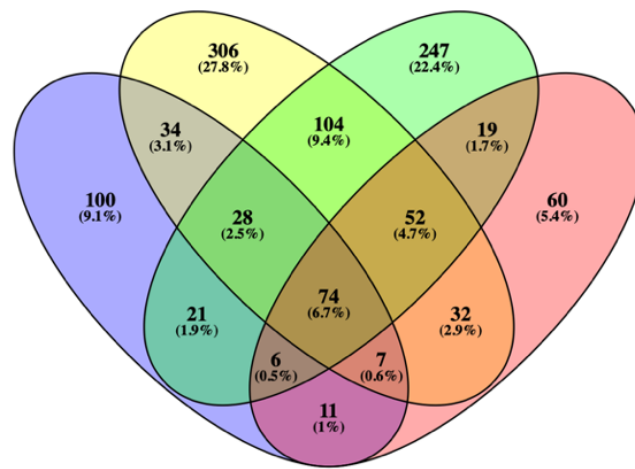

**Supplementary figure 1C.** Venn diagram of shared OTU in epimural microbiota in the jejunum of control cows.

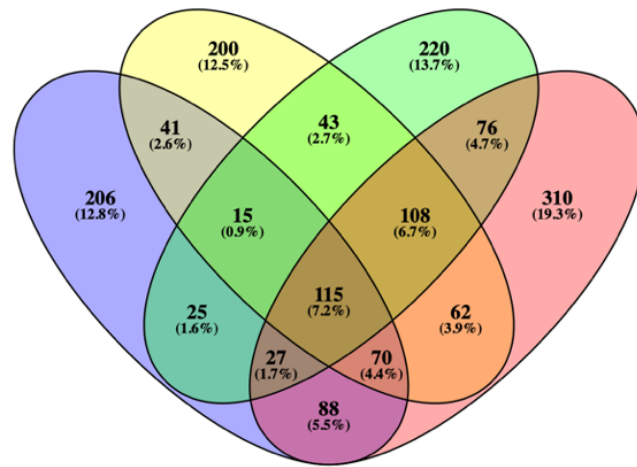

**Supplementary figure 1D.** Venn diagram of shared OTU in epimural microbiota in the ileum of control cows.

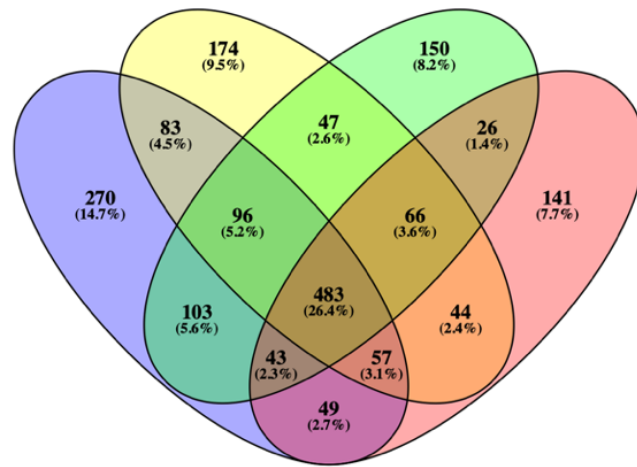

**Supplementary figure 1E.** Venn diagram of shared OTU in epimural microbiota in the cecum of control cows.

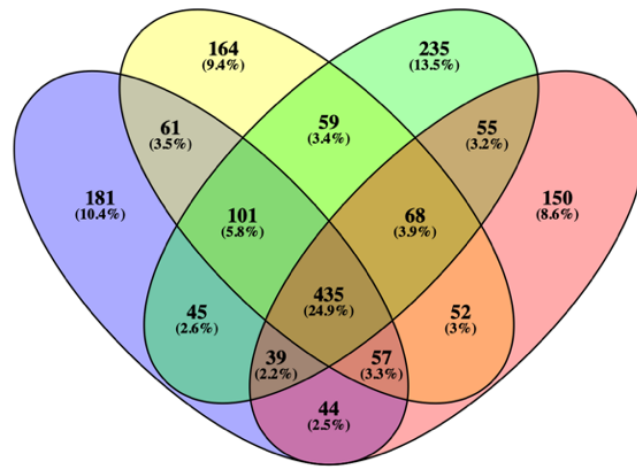

**Supplementary figure 1E.** Venn diagram of shared OTU in epimural microbiota in the colon of control cows.



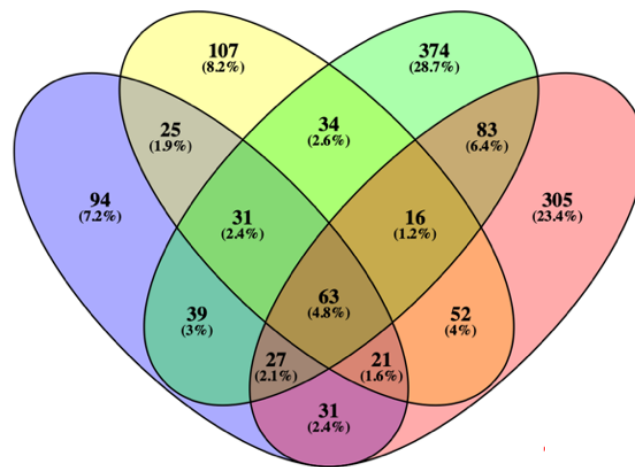

**Supplementary figure 1F.** Venn diagram of shared OTU in epimural microbiota in the rumen of SARA cows.

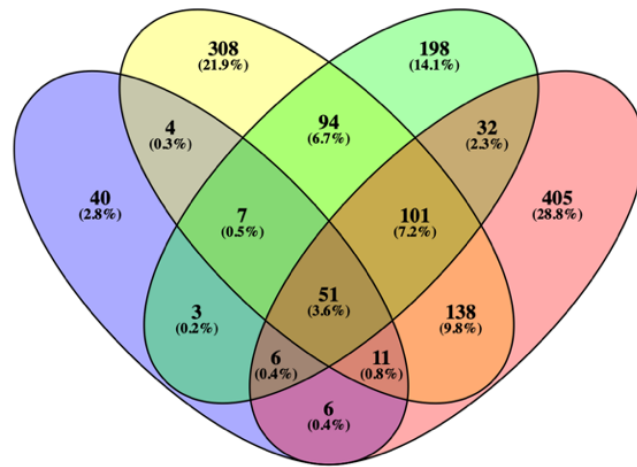

**Supplementary figure 1G.** Venn diagram of shared OTU in epimural microbiota in the duodenum of SARA cows.

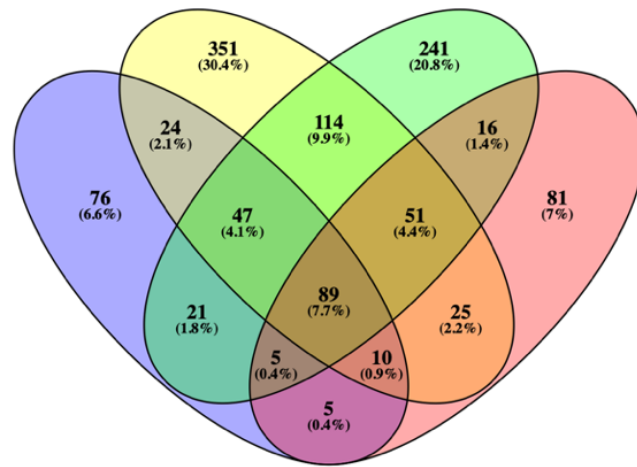

**Supplementary figure 1H.** Venn diagram of shared OTU in epimural microbiota in the jejunum of SARA cows.

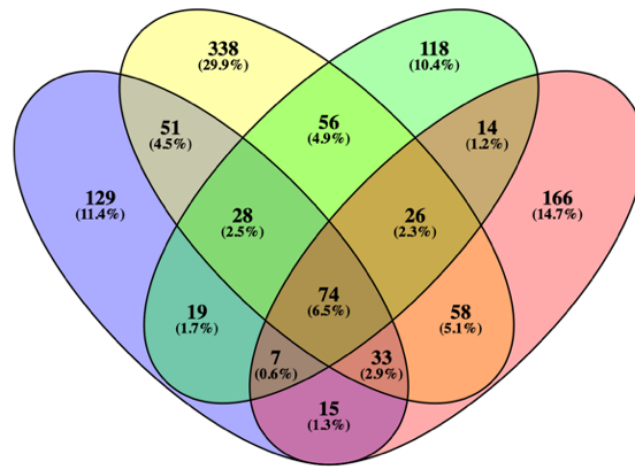

**Supplementary figure 1I.** Venn diagram of shared OTU in epimural microbiota in the ileum of SARA cows.

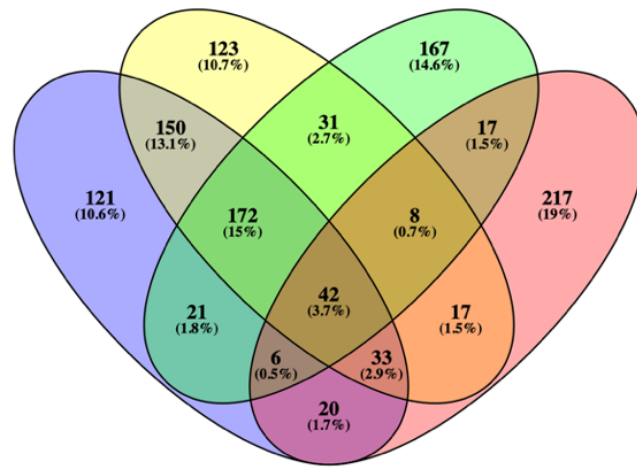

**Supplementary figure 1J.** Venn diagram of shared OTU in epimural microbiota in the cecum of SARA cows.

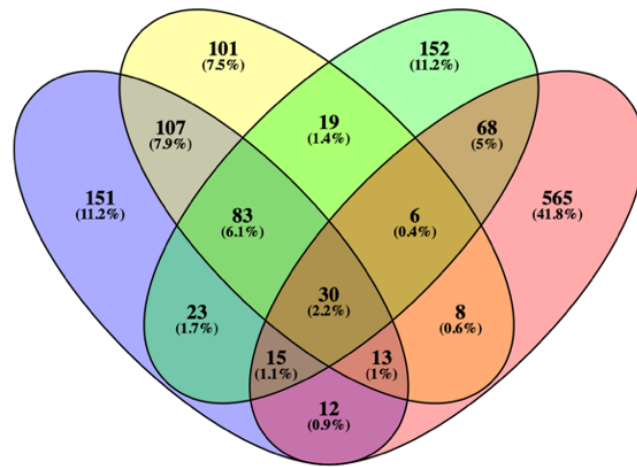

**Supplementary figure 1K.** Venn diagram of shared OTU in epimicrobial microbiota in the colon of SARA cows.
